# Supplementary material
Source: HighWire-hosted journal article supplement (doi:10.1101/rna.079077.121)
Supplement: Supplemental_Files_1_13.zip [file S12-Correlation_of_NMD_mutant_to_cDTA.pdf › S12-Correlation_of_NMD_mutant_to_cDTA.pdf]

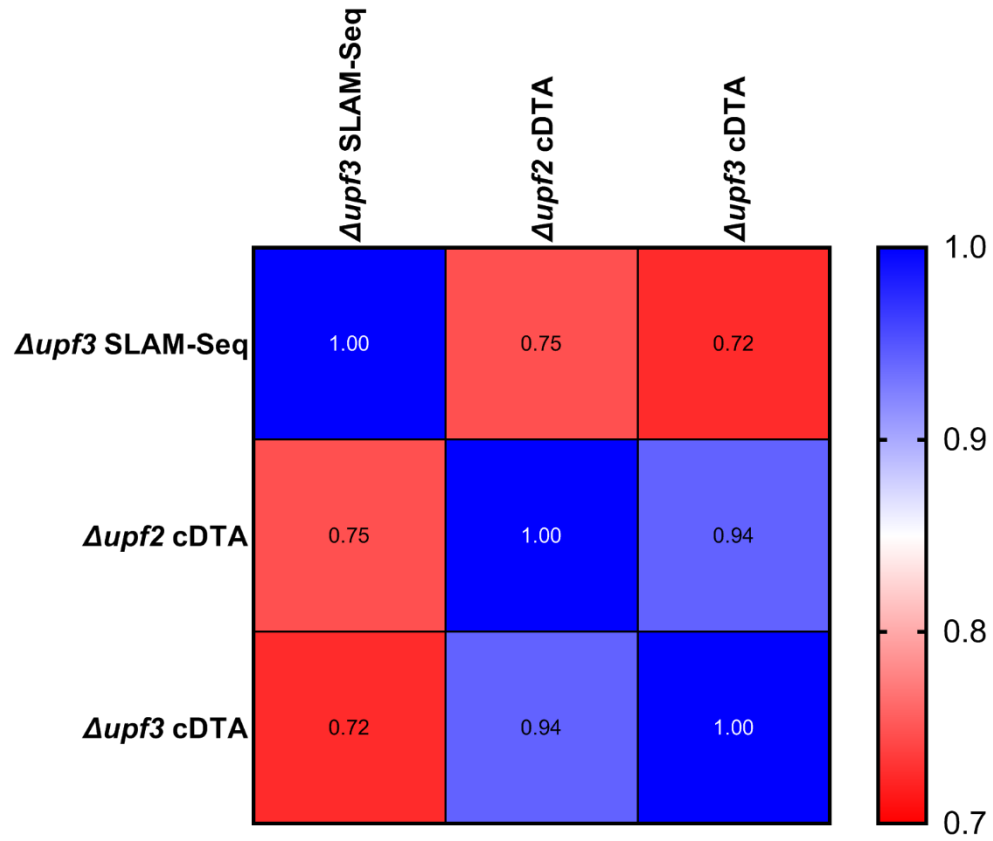

**Figure S12.** Spearman's Rho comparison of half-lives calculated for  $\Delta upf3$  using SLAM-Seq to half-lives calculated for  $\Delta upf2$  and  $\Delta upf3$  using cDTA (Sun et al. 2013).
