# Supplementary material
Source: HighWire-hosted journal article supplement (doi:10.1101/rna.079077.121)
Supplement: Supplemental_Files_1_13.zip [file S13-Distribution_of_half-life_ratio.pdf › S13-Distribution_of_half-life_ratio.pdf]

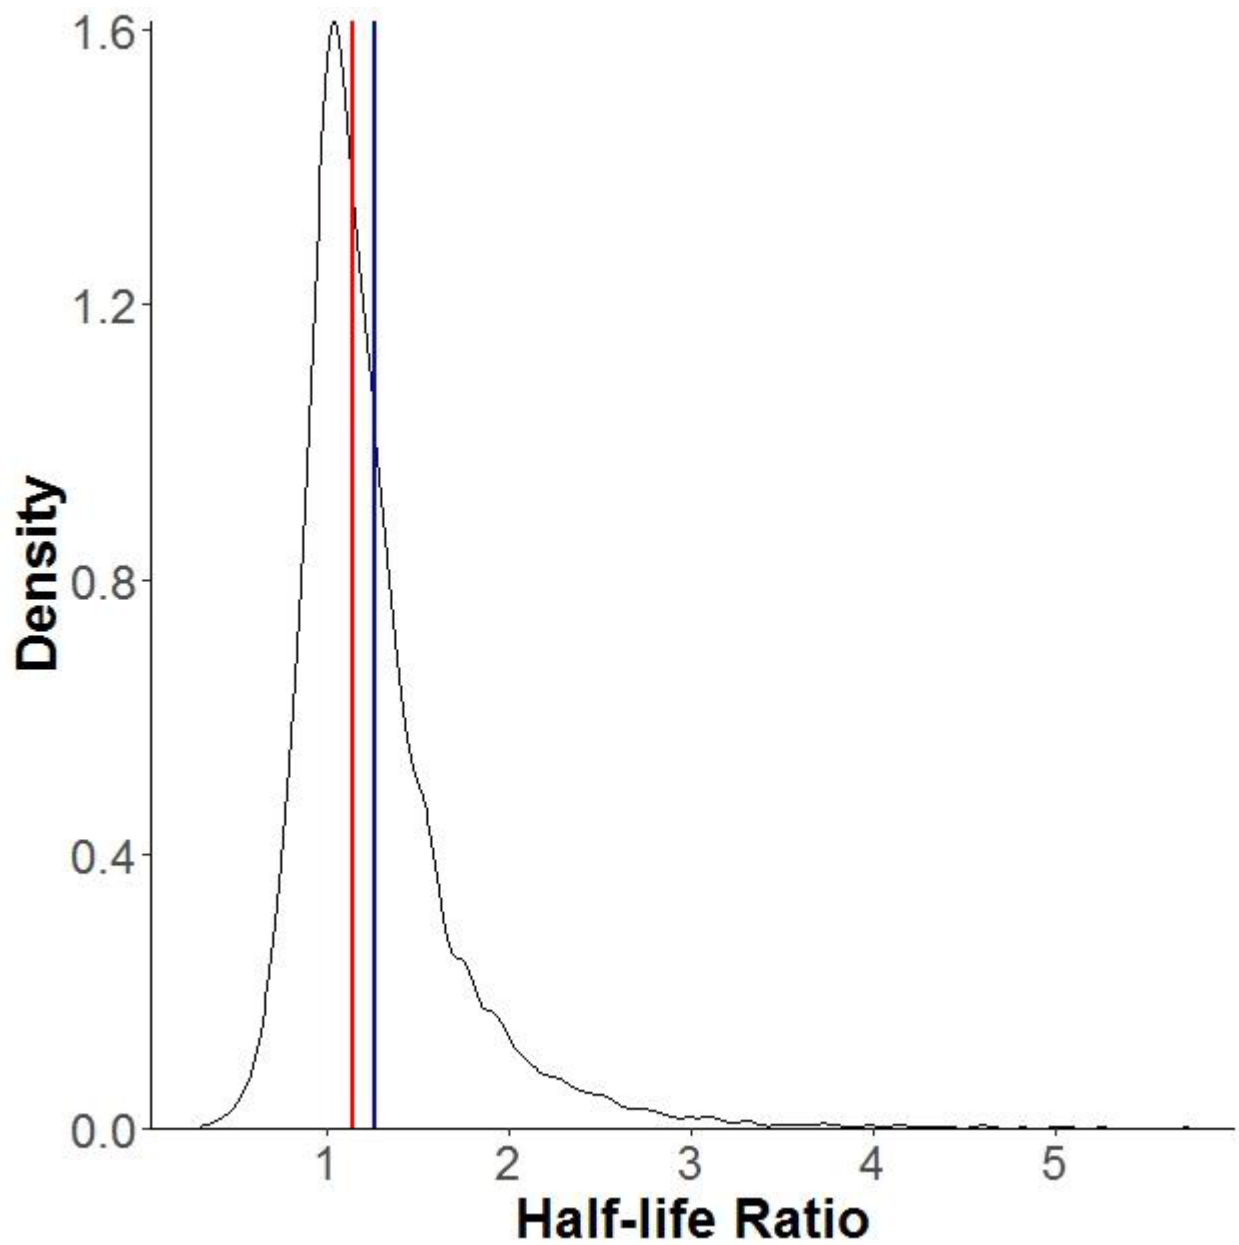

**Figure S13.** Distribution of Half-Life Ratio of *upf3Δ* to wt. The red line indicates the mean while the blue line indicates the median. The distribution was right skewed as expected with the majority of the transcripts not having a significant change in half-life and the majority of those that do have a significant change being upregulated.
