# Supplementary material
Source: HighWire-hosted journal article supplement (doi:10.1101/rna.079077.121)
Supplement: Supplemental_Legends.docx [file Supplemental_Legends.docx]

**SUPPLEMENTARY FILES**

**Supplementary File S1** Quality check report, experimental replicate 1

**Supplementary File S2** Quality check report, experimental replicate 2

**Supplementary File S3** Quality check report, experimental replicate 3

**Supplementary File S4** Index for all samples, all replicates

**Supplementary File S5** Full unfiltered dataset for both strains

**Supplementary File S6** GO term enrichment for the 1 % most long-lived transcripts

**Supplementary File S7** Full list of transcripts with altered half-life in *upf3Δ* mutants

**Supplementary File S8** Transcripts with too few counts in wt to be considered for quantitative evaluation, even if their number of counts was increased in *upf3Δ* mutants

**Supplementary File S9** Description of construction of 3’-UTR reading windows

**Supplementary File S10** BED file of all 3´-UTR reading windows

**Supplementary File S11** Exact sampling times

**Supplementary File S12** Comparison of half-lives in NMD mutants determined with SLAM-Seq or cDTA

**Supplementary File S13** Distribution of half-life ratios between *upf3∆* mutants and wt
